# Supplementary material for: The Effects of Spaceflight Factors on the Human Plasma Proteome, Including Both Real Space Missions and Ground-Based Experiments
Source: MDPI journal article supplement (doi:10.3390/ijms20133194), 2019-06-29
Supplement: s1 [file s1]

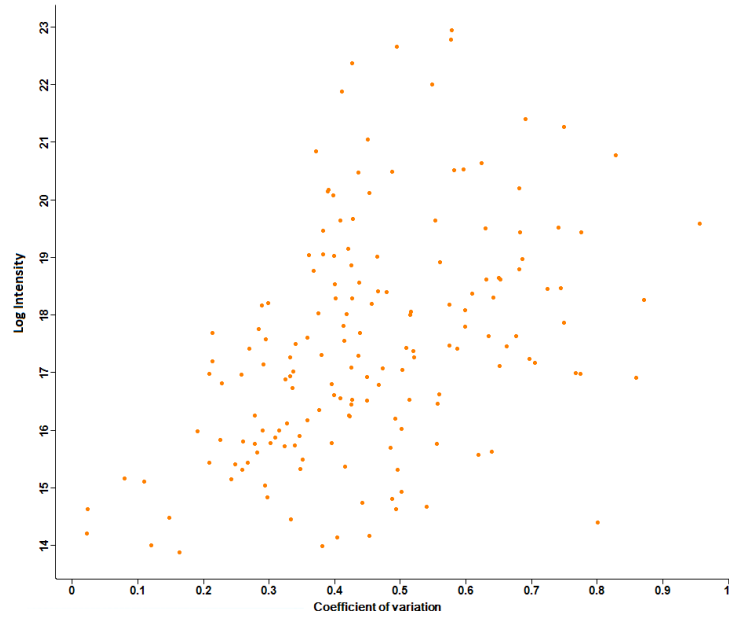

**Figure 1S.** Coefficient of variation plotted against the abundance of the proteins demonstrates variations of the plasma proteins in the data set .

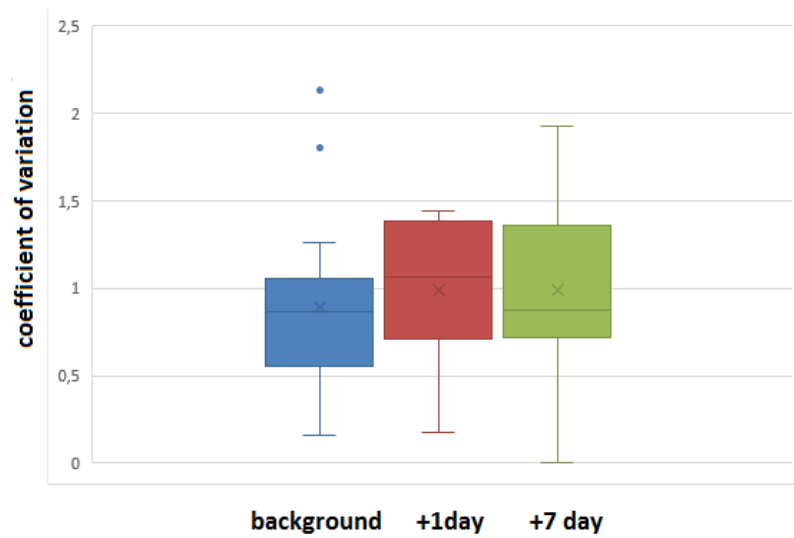

**Figure 2S.** Distribution of coefficients of variation in different time points for significantly changed proteins on +1 day after landing.
